# Supplementary material for: Avacopan in Patients With Rapidly Progressive Glomerulonephritis Requiring Dialysis
Source: PubMed Central journal article supplement (PMC10403643; doi:10.1016/j.ekir.2023.05.017), 2023-05-29
Supplement: mmc1.pdf [file mmc1.pdf]

## Supplementary Material

| Week  | Prednisone (mg)<br>AAV | Prednisone (mg)<br>anti-GBM + AAV |
|-------|------------------------|-----------------------------------|
| 1     | 60 mg                  | 60 mg                             |
| 2     | 40 mg                  | 40 mg                             |
| 3     | 30 mg                  | 30 mg                             |
| 4     | 20 mg                  | 20 mg                             |
| 5-6   | 15 mg                  | 15 mg                             |
| 7-8   | 10 mg                  | 15 mg                             |
| 9-10  | 5 mg                   | 10 mg                             |
| 11-12 | 0                      | 10 mg                             |
| 13-14 | 0                      | 5 mg                              |
| 15-16 | 0                      | 5 mg                              |

**Supplemental Table.** Prednisone taper administered to patients. AAV, anti-neutrophil cytoplasmic antibody associated vasculitis. Anti-GBM, anti-glomerular basement membrane disease

## Supplemental References

- S1. Walsh M, Collister D, Zeng L, *et al.* The effects of plasma exchange in patients with ANCA-associated vasculitis: an updated systematic review and meta-analysis. *BMJ* 2022; **376**: e064604.
- S2. Berden AE, Ferrario F, Hagen EC, *et al.* Histopathologic classification of ANCA-associated glomerulonephritis. *J Am Soc Nephrol* 2010; **21**: 1628-1636.
- S3. Gabilan C, Pfirmann P, Ribes D, *et al.* Avacopan as First-Line Treatment in Antineutrophil Cytoplasmic Antibody-Associated Vasculitis: A Steroid-Sparing Option. *Kidney Int Rep* 2022; **7**: 1115-1118.
- S4. Xiao H, Dairaghi DJ, Powers JP, *et al.* C5a receptor (CD88) blockade protects against MPO-ANCA GN. *J Am Soc Nephrol* 2014; **25**: 225-231.
- S5. Hilhorst M, van Paassen P, van Rie H, *et al.* Complement in ANCA-associated glomerulonephritis. *Nephrol Dial Transplant* 2017; **32**: 1302-1313.
- S6. National Center for Biotechnology Information. PubChem Compound Summary for CID 49841217, Avacopan. <https://pubchem.ncbi.nlm.nih.gov/compound/Avacopan>. Accessed Nov. 12, 2022.
